# Supplementary material
Source: PubMed Central journal article supplement (PMC2696559)
Supplement: NIHMS109925-supplement-1_si_001.pdf [file NIHMS109925-supplement-1_si_001.pdf]

## SUPPORTING INFORMATION

### **The *Bis*-Electrophile Diepxybutane Cross-links DNA to Human Histones but Does Not Result in Enhanced Mutagenesis in Recombinant Systems**

Elisabeth M. Loecken, Surendra Dasari, Salisha Hill, David L. Tabb,  
and F. Peter Guengerich

*Chem. Res. Toxicol.* 22, 000-000 (2009)

#### CONTENTS

**Table S1.** Histone proteins identified in two independent screens for cross-link candidates.

**Figure S2.** Mutagenicity and survivorship in TRG8 cells expressing AGT, H2b, or containing pINIII vector treated with 1,2-dibromoethane.

**Figure S3.** Cross-linking of purified histone H2b to single-stranded or double-stranded oligonucleotides by diepxybutane.

**Table S1.** Histone proteins identified in two independent screens for cross-link candidates.

| <b>Histone Protein</b>   | <b>Uniref100 ID</b> | <b>% Coverage</b> |
|--------------------------|---------------------|-------------------|
| Histone H2A.m            | P04908              | 41                |
| Histone H3/b             | Q93081              | 13                |
| Hisonte H4               | Q6FGB8              | 17                |
| Histone protein          | Q5R2W0              | 27                |
| Histone 1, H2aj          | Q5JXQ5              | 14                |
| Histone 4                | Q4A487              | 22                |
| Core histone macro-H2A.1 | O75367              | 11                |
| Histone protein          | Q5R2W0              | 38                |
| Histone H3/b             | Q93081              | 20                |
| Histone H4               | Q6FGB8              | 50                |
| Histone H2A.m            | P04908              | 36                |

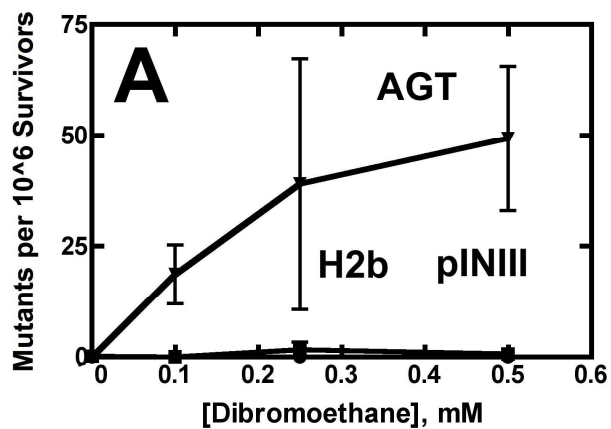

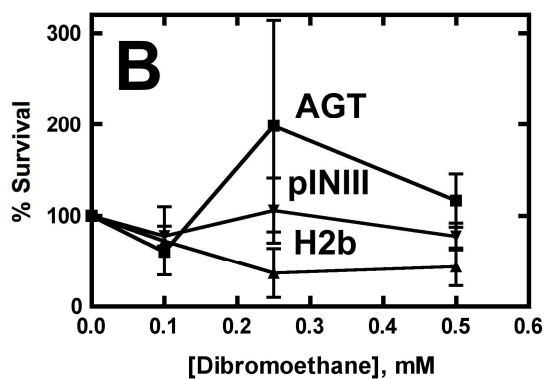

**Figure S2.** Mutagenicity (S2A) and survivorship (S2B) in TRG8 cells (expressing AGT or histone H2b or containing pINIII vector treated) with 1,2-dibromoethane for 30 min at 37 °C before growing the cells on *his*<sup>+</sup> and *his*<sup>-</sup> plates.

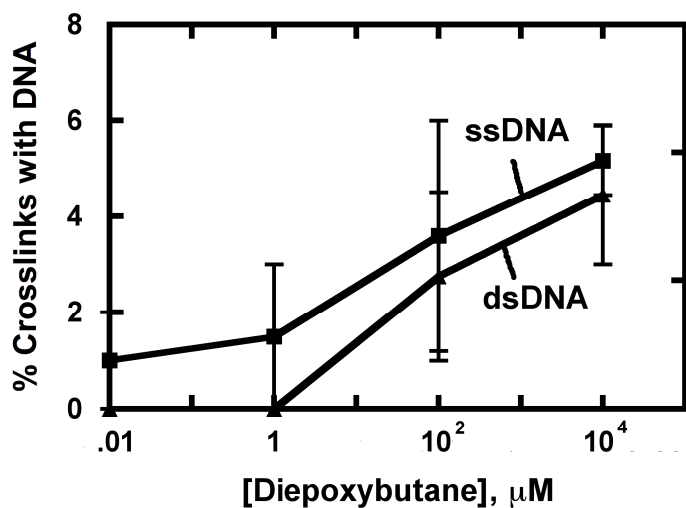

**Figure S3.** Cross-linking of purified histone H2b to single-stranded or double-stranded oligonucleotides by diepoxybutane. Gel shift assays were performed by incubating histone H2b (1 μg) with <sup>32</sup>P-5'-end-labeled 16-mer single-stranded or double-stranded oligonucleotides in reactions containing various concentrations of diepoxybutane overnight at 37 °C. Samples were separated by SDS-polyacrylamide gel (15% w/v) electrophoresis and DNA-protein cross-links were detected via autoradiography and quantified using Quantity One software (BioRad).
